# Supplementary material for: Well-Being and Perceived Stress of Adolescent Young Carers: A Cross-Sectional Comparative Study
Source: Springer Nature journal article supplement (doi:10.1007/s10826-021-02097-w), 2021-11-05
Supplement: MOESM1 [file 19834460]

**Online Appendices**

**Appendix 1: Results Based on a Stricter Family Definition**

We re-run all analyses using a narrower definition of adolescent young carers in terms of who the care recipient may be. Specifically, the stricter definition applies to adolescent young carers of parents, siblings or grandparents. Table A1-1 corresponds to Table 1 and contains additional information about the care recipient. Table A1-2 and Table A1-3 correspond to Table 2, and Table A1-4 and Table A1-5 can be compared directly to Table 3 and Table 4, respectively.

**Table A1-1**

*Background and Outcome Variables Overall and by Carer Status Groups Based on a Stricter Family Definition*

|  |  | Carers | Noncarers | |
| --- | --- | --- | --- | --- |
|  | Overall  (*N* = 2525) | fAYC  (*n* = 259) | fFHP  (*n* = 410) | fHF  (*n* = 1856) |
| Gender, % [CI] female | 59.6 [57.7, 61.5] | 73.7 [68.1, 78.7] | 70.0 [65.4, 74.2] | 55.3 [53.1, 57.6] |
| Age in years, *M* (*SD*) | 17.73 (1.55) | 17.93 (1.59) | 17.83 (1.61) | 17.68 (1.52) |
| Nationality, % Swiss | 71.5 [69.7, 73.2] | 73.4 [67.7, 78.4] | 77.1 [72.8, 80.9] | 69.9 [67.8, 72.0] |
| Education, % [CI] |  |  |  |  |
| General education | 8.3 [7.3, 9.5] | 7.3 [4.7, 11.2] | 8.3 [6.0, 11.4] | 8.5 [7.3, 9.8] |
| VET | 85.6 [84.2, 86.9] | 83.8 [78.8, 87.8] | 85.4 [81.6, 88.5] | 85.9 [84.2, 87.4] |
| Transitional options | 2.9 [2.3, 3.6] | 3.5 [1.8, 6.5] | 1.5 [0.7, 3.2] | 3.1 [2.4, 4.0] |
| Other | 3.3 [2.6, 4.0] | 5.4 [3.2, 8.9] | 4.9 [3.2, 7.4] | 2.6 [2.0, 3.4] |
| Family instability, % [CI] |  |  |  |  |
| Structure | 52.2 [50.3, 54.2] | 64.1 [58.1, 69.7] | 58.3 [53.5, 63.0] | 49.2 [47.0, 51.5] |
| Economic | 38.7 [36.8, 40.6] | 52.5 [46.4, 58.5] | 43.7 [38.9, 48.5] | 35.6 [33.5, 37.8] |
| Life events, *M* (*SD*) | 7.71 (4.91) | 10.01 (4.97) | 8.49 (4.8) | 7.21 (4.81) |
| Well-being, *M* (*SD*) | 50.89 (8.76) | 49.03 (8.29) | 50.81 (8.62) | 51.17 (8.83) |
| Perceived stress, *M* (*SD*) | 20.32 (6.24) | 23.01 (5.79) | 20.7 (6.6) | 19.86 (6.13) |
| Caring role |  |  |  |  |
| Responsibility, *M* (*SD*) |  | 25.76 (6.37) |  |  |
| Recognition M (*SD*) |  | 20.79 (4.71) |  |  |
| Support, *M* (*SD*) |  | 20.15 (4.68) |  |  |
| Onset as a child, % [CI] (younger than 13 years) |  | 41.7 [35.9, 47.8] |  |  |
| Relationship to CR, % [CI] |  |  |  |  |
| parent |  | 49.8 [43.8,55.9] |  |  |
| sibling |  | 19.3 [15.0, 24.5] |  |  |
| grandparent (great-) |  | 30.9 [25.6,36.8] |  |  |
| Health problems, % [CI] |  |  |  |  |
| physical |  | 40.2 [34.4, 46.2] |  |  |
| mental/cognitive |  | 35.9 [30.3, 41.9] |  |  |
| multiple |  | 23.9 [19.1, 29.5] |  |  |
| Gender, % [CI] female |  | 70.3 [64.4, 75.5] |  |  |
| Co-residence, % [CI] yes/partly |  | 75.3 [69.7, 80.1] |  |  |

*Note.* fAYC = adolescent young carers of a parent, sibling, or grandparent; fFHP = adolescents confronted with a parent’s, sibling’s or grandparent’s health problems; fHF = adolescents from a healthy family background; CI = 95 % confidence intervals for binomial proportions following the Wilson method; VET = vocational education and training, general education = specialized or a baccalaureate school; structure = disrupted family structure; economic = economic hardship.

**Table A1-2**

*Multiple Regression of Caring Status Based on a Stricter Family Definition as Predictors of Well-Being and Perceived Stress Among Adolescents When Controlling for Demographics and Family Instability*

|  | Well-being | | | | Perceived Stress | | | |
| --- | --- | --- | --- | --- | --- | --- | --- | --- |
| Predictors | *ΔR2* | *B* | *SE B* | β | *ΔR2* | *B* | *SE B* | β |
| Intercept |  | 48.37*** | 2.05 |  |  | 22.41*** | 1.41 |  |
| Carer status (ref. = fAYC) | .01** |  |  |  | .02*** |  |  |  |
| fFHP |  | 1.42* | 0.68 | .06 |  | -1.98*** | 0.47 | -.12 |
| fHF |  | 1.37* | 0.58 | .07 |  | -2.20*** | 0.40 | -.16 |
| Demographics | .03*** |  |  |  | .06*** |  |  |  |
| Gender (ref. = female) |  | 2.09*** | 0.35 | .12 |  | -3.03*** | 0.24 | -.24 |
| Age |  | 0.12 | 0.11 | .02 |  | -0.01 | 0.08 | -.00 |
| Nationality (ref. = Swiss) |  | -1.72*** | 0.38 | -.09 |  | 0.40 | 0.26 | .03 |
| Family instability | .02*** |  |  |  | .03*** |  |  |  |
| Structure (ref. = no) |  | -0.75* | 0.35 | -.04 |  | 0.62* | 0.24 | .05 |
| Economic (ref. = no) |  | -2.14*** | 0.37 | -.12 |  | 1.87*** | 0.25 | .15 |
| Explained variance |  | *R*2 = 0.05 / *R*2adj = 0.05 | | |  | *R*2 = 0.11 / *R*2*adj* = 0.11 | | |
| *F*-test |  | *F*(7, 2517) = 18.24*** | | |  | *F*(7, 2517) = 45.25*** | | |

*Note.* *N* = 2525; fAYC = adolescent young carers of a parent, sibling, or grandparent; fFHP = adolescents confronted with a parent’s, sibling’s or grandparent’s health problems; fHF = adolescents from a healthy family background (= parents, siblings nor grandparents with health problems); structure = disrupted family structure; economic = economic hardship.

* *p* < .05. ** *p* < .01. *** *p* < .001.

**Table A1-3**

*Multiple Regression of Carer Status Based on a Stricter Family Definition, Family Instability Indicators, and Interaction Term as Predictors of Well-Being and Perceived Stress*

|  | Well-being | | | | | | |  | Perceived stress | | | | | | |
| --- | --- | --- | --- | --- | --- | --- | --- | --- | --- | --- | --- | --- | --- | --- | --- |
|  | Interaction Model A | | |  | Interaction Model B | | |  | Interaction Model A | | |  | Interaction Model B | | |
| Predictors | *B* | *SE B* | β |  | *B* | *SE B* | β |  | *B* | *SE B* | β |  | *B* | *SE B* | β |
| Intercept | 49.81*** | 1.97 |  |  | 49.79*** | 1.97 |  |  | 20.18*** | 1.36 |  |  | 20.22*** | 1.36 |  |
| Covariates |  |  |  |  |  |  |  |  |  |  |  |  |  |  |  |
| Gender (ref. = female) | 2.09*** | 0.35 | .12 |  | 2.08*** | 0.35 | .12 |  | -3.04*** | 0.24 | -.24 |  | -3.04*** | 0.24 | -.24 |
| Age | 0.12 | 0.11 | .02 |  | 0.12 | 0.11 | .02 |  | -0.00 | 0.08 | -.00 |  | -0.00 | 0.08 | -.00 |
| Nationality (ref. = Swiss) | -1.72*** | 0.38 | -.09 |  | -1.71*** | 0.38 | -.09 |  | 0.39 | 0.26 | .03 |  | 0.39 | 0.26 | .03 |
| Main effects |  |  |  |  |  |  |  |  |  |  |  |  |  |  |  |
| Structure (ref. = no) | -0.81* | 0.37 | -.05 |  | -0.75* | 0.35 | -.04 |  | 0.69** | 0.25 | .06 |  | 0.63** | 0.24 | .05 |
| Economic (ref. = no) | -2.14*** | 0.37 | -.12 |  | -2.26*** | 0.39 | -.13 |  | 1.88*** | 0.25 | .15 |  | 1.91*** | 0.27 | .15 |
| Carer status (ref. not fAYC) | -1.84* | 0.92 | -.06 |  | -1.96* | 0.81 | -.07 |  | 2.52*** | 0.64 | .12 |  | 2.29*** | 0.56 | .11 |
| Interaction |  |  |  |  |  |  |  |  |  |  |  |  |  |  |  |
| Carer status x structure | 0.73 | 1.17 | .04 |  |  |  |  |  | -0.59 | 0.80 | -.02 |  |  |  |  |
| Carer status x economic |  |  |  |  | 1.13 | 1.13 | -.03 |  |  |  |  |  | -0.27 | 0.78 | -.01 |
| Explained variance | *R*2 = 0.05 / *R*2*adj* = 0.05 | | |  | *R*2 = 0.05 / *R*2*adj* = 0.05 | | |  | *R*2 = 0.11 / *R*2*adj* = 0.11 | | |  | *R*2 = 0.11 / *R*2*adj* = 0.11 | | |
| *F*-test | *F*(7, 2517) = 18.30*** | | |  | *F*(7, 2517) = 18.39*** | | |  | *F*(7, 2517) = 45.26*** | | |  | *F*(7, 2517) = 45.19*** | | |

*Note.* *N* = 2525; fAYC = adolescent young carers of a parent, sibling, or grandparent; fFHP = adolescents confronted with a parent’s, sibling’s or grandparent’s health problems; fHF = adolescents from a healthy family background (= parents, siblings nor grandparents with health problems); structure = disrupted family structure; economic = economic hardship.

* *p* < .05. ** *p* < .01. *** *p* < .001.

**Table A1-4**

*Multiple Regression of Background, Caring Context, and Caring Experience Variables as Predictors of Well-Being and Perceived Stress Among Adolescent Young Carers (Based on a Stricter Family Definition)*

|  | Well-being | | | | Perceived Stress | | | |
| --- | --- | --- | --- | --- | --- | --- | --- | --- |
| Predictors | *ΔR2* | *B* | *SE B* | β | *ΔR2* | *B* | *SE B* | β |
| Intercept |  | 23.82*** | 5.95 |  |  | 27.92*** | 4.09 |  |
| Background | .08*** |  |  |  | .16*** |  |  |  |
| Gender (ref. = female) |  | 1.31 | 1.07 | .07 |  | -3.07*** | 0.74 | -.23 |
| Age |  | 0.75* | 0.32 | .14 |  | -0.15 | 0.22 | -.04 |
| Nationality (ref. = Swiss) |  | -0.61 | 1.13 | -.03 |  | -0.03 | 0.78 | -.01 |
| Life events |  | -0.22* | 0.10 | -.13 |  | 0.29*** | 0.07 | .25 |
| Caring context and role | .02 |  |  |  | .03 |  |  |  |
| Relationship to CR (ref. = not a parent) |  | 0.56 | 1.09 | .03 |  | -0.77 | 0.75 | -.06 |
| Co-residence (ref. = partly or yes) |  | 1.99 | 1.24 | .10 |  | -1.17 | 0.85 | -.09 |
| Illness/disability (ref. = physical) |  | -0.27 | 0.99 | -.02 |  | -1.14 | 0.68 | -.10 |
| Caring responsibility |  | -0.08 | 0.08 | -.06 |  | 0.15** | 0.06 | .16 |
| Onset as child (ref. = 13 years or older) |  | 1.85 | 0.99 | .11 |  | -0.30 | 0.68 | -.02 |
| Resources for caring | .12*** |  |  |  | .05*** |  |  |  |
| Recognition |  | 0.48*** | 0.13 | .27 |  | -0.28** | 0.09 | -.23 |
| Support |  | 0.23 | 0.13 | .13 |  | -0.04 | 0.09 | -.03 |
| Explained variance |  | *R*2 = 0.22 / *R*2*adj* = 0.18 | | |  | *R*2 = 0.24 / *R*2*adj* = 0.21 | | |
| *F*-test |  | *F*(11, 247) = 6.30*** | | |  | *F*(11, 247) = 7.22*** | | |

*Note. N* = 259; life events = count of experienced critical life events; CR = care recipient; caring responsibility = perceived caring responsibility; onset as child = onset of caring before the age of 13 years; recognition = perceived recognition of caring role; support = perceived support for caring.

* *p* < .05. ** *p* < .01. *** *p* < .001.

**Appendix 2: Supplementary Information on Moderation Analyses**

The following two tables displaying detailed information on the moderation analyses to test Hypothesis 3 and 4 supplement Table 3.

**Table A2-1**

*Multiple Regression Analysis of Carer Role Status and Family Instability Indicators and Interaction Term as Predictors of Well-Being (All Steps Documented)*

|  | Model without interaction | | | Interaction model A | | | Interaction model B | | |
| --- | --- | --- | --- | --- | --- | --- | --- | --- | --- |
| Predictors | *B* | *SE B* | β | *B* | *SE B* | β | *B* | *SE B* | β |
| Intercept | 49.76*** | 1.97 |  | 49.71*** | 1.97 |  | 49.79*** | 1.97 |  |
| Covariates |  |  |  |  |  |  |  |  |  |
| Gender (ref. = female) | 2.08*** | 0.35 | .12 | 2.08*** | 0.35 | .12 | 2.07*** | 0.35 | .12 |
| Age | 0.12 | 0.11 | .02 | 0.12 | 0.11 | .02 | 0.12 | 0.11 | .02 |
| Nationality (ref. = Swiss) | -1.68*** | 0.38 | -.09 | -1.69*** | 0.38 | -.09 | -1.68*** | 0.38 | -.09 |
| Main effects |  |  |  |  |  |  |  |  |  |
| Structure (ref. no) | -0.73* | 0.35 | -.04 | -0.66 | 0.38 | -.04 | -0.73* | 0.35 | -.04 |
| Economic (ref. no) | -2.10*** | 0.37 | -.12 | -2.10*** | 0.37 | -.12 | -2.21*** | 0.40 | -.12 |
| Carer role status (ref. not AYC) | -1.34** | 0.47 | -.06 | -1.06 | 0.75 | -.04 | -1.66* | 0.66 | -.07 |
| Interaction |  |  |  |  |  |  |  |  |  |
| Carer role status x structure |  |  |  | -0.46 | 0.96 | -.02 |  |  |  |
| Carer role status x economic |  |  |  |  |  |  | 0.66 | 0.94 | .02 |
| Explained variance | *R*2 = .05 / *R*2*adj* = .05 | | | *R*2 = .05 / *R*2*adj* = .05, *ΔR2* =.00 | | | *R*2 = .05 / *R*2*adj* = .05, *ΔR2* =.00 | | |
| *F*-test | *F*(6, 2518) = 21.66*** | | | *F*(7, 2517) = 18.59*** | | | *F*(7, 2517) = 18.63*** | | |

*Note. N* = 2,525*;* AYC = adolescent young carers; structure = disrupted family structure; economic = economic hardship.

* *p* < .05. ** *p* < .01. *** *p* < .001.

**Table A2-2**

*Multiple Regression Analysis of Carer Role Status and Family Instability Indicators and Interaction Term as Predictors of Perceived Stress (All Steps Documented)*

|  | Model without interaction | | | Interaction model A | | | Interaction model B | | |
| --- | --- | --- | --- | --- | --- | --- | --- | --- | --- |
| Predictors | *B* | *SE B* | β | *B* | *SE B* | β | *B* | *SE B* | β |
| Intercept | 20.21*** | 1.35 |  | 20.17*** | 1.35 |  | 20.22*** | 1.35 |  |
| Covariates |  |  |  |  |  |  |  |  |  |
| Gender (ref. = female) | -3.01*** | 0.24 | -.24 | -3.01*** | 0.24 | -.24 | -3.01*** | 0.24 | -.24 |
| Age | -0.01 | 0.08 | -.00 | -0.01 | 0.08 | -.00 | -0.01 | 0.08 | -.00 |
| Nationality (ref. = Swiss) | 0.33 | 0.26 | .02 | 0.32 | 0.26 | .02 | 0.33 | 0.26 | .02 |
| Main effects |  |  |  |  |  |  |  |  |  |
| Structure (ref. no) | 0.59* | 0.24 | .05 | 0.65* | 0.26 | .05 | 0.59* | 0.24 | .05 |
| Economic (ref. no) | 1.81*** | 0.25 | .14 | 1.81*** | 0.25 | .14 | 1.78*** | 0.28 | .14 |
| Carer role status (ref. not AYC) | 2.36*** | 0.32 | .14 | 2.62*** | 0.51 | .15 | 2.29*** | 0.46 | .14 |
| Interaction |  |  |  |  |  |  |  |  |  |
| Carer role status x structure |  |  |  | -0.41 | 0.66 | -.02 |  |  |  |
| Carer role status x economic |  |  |  |  |  |  | 0.15 | 0.64 | .01 |
| Explained variance | *R*2 = .12 / *R*2*adj* = .12 | | | *R*2 = .12 / *R*2*adj* = .12, *ΔR2* =.00 | | | *R*2 = .12 / *R*2*adj* = .12, *ΔR2* =.00 | | |
| *F*-test | *F*(6, 2518) = 57.06*** | | | *F*(7, 2517) = 48.95*** | | | *F*(7, 2517) = 48.90*** | | |

*Note. N* = 2,525*;* AYC = adolescent young carers; structure = disrupted family structure; economic = economic hardship.

* *p* < .05. ** *p* < .01. *** *p* < .001.
